# Supplementary material for: Establishment of a Simple, Sensitive, and Specific Salmonella Detection Method Based on Recombinase-Aided Amplification Combined with dsDNA-Specific Nucleases
Source: MDPI journal article supplement (doi:10.3390/foods13091380), 2024-04-29
Supplement: s1 [file s1]

Supplementary Material

# **Establishment of a Simple, Sensitive, and Specific *Salmonella* Detection Method Based on Recombinase-Aided Amplification Combined with dsDNA-Specific Nucleases**

**Changyu Zhou <sup>1,2,†</sup>, Yu Zhao <sup>1,2,†</sup>, Boyan Guo <sup>1,2</sup>, Ming Yang <sup>1,2</sup>, Qiang Xu <sup>1,2</sup>, Changwei Lei <sup>1,2</sup> and Hongning Wang <sup>1,2,\*</sup>**

<sup>1</sup> Key Laboratory of Bio-Resource and Eco-Environment of Ministry of Education, College of Life Sciences, Sichuan University, Chengdu 610017, China; l1z2l3y4@163.com (C.Z.); zhaoyu3@stu.scu.edu.cn (Y.Z.); gby0229@163.com (B.G.)

<sup>2</sup> Animal Disease Prevention and Food Safety Key Laboratory of Sichuan Province, Chengdu 610064, China

\* Correspondence: hongningwang@scu.edu.cn

<sup>†</sup> These authors contributed equally to this work and considered as co-first authors.

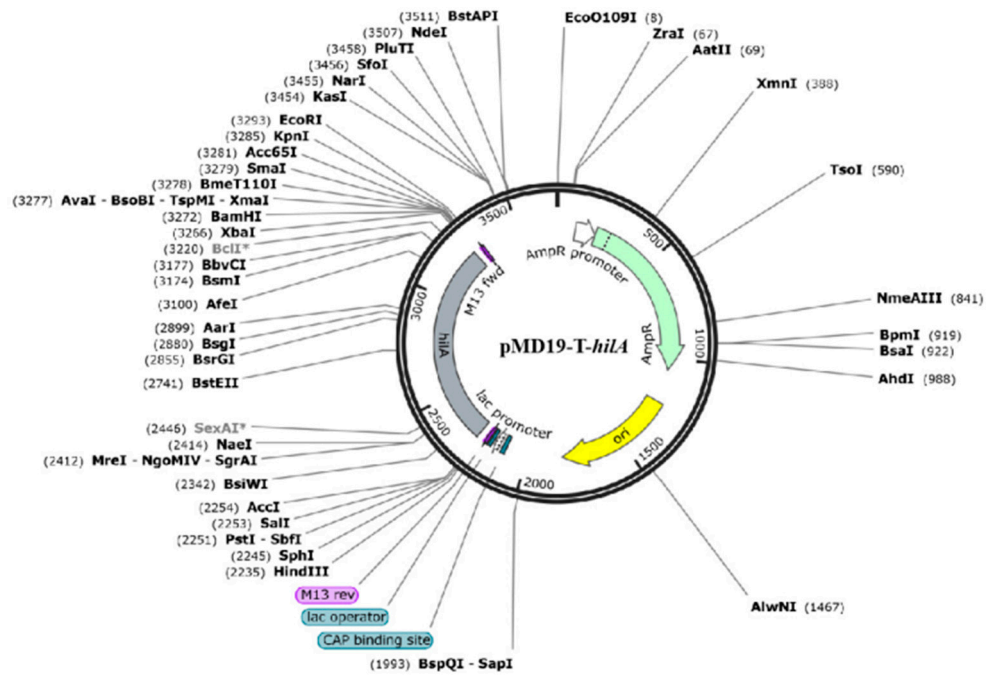

**Figure S1.** pMD19-T-*hilA* plasmid map

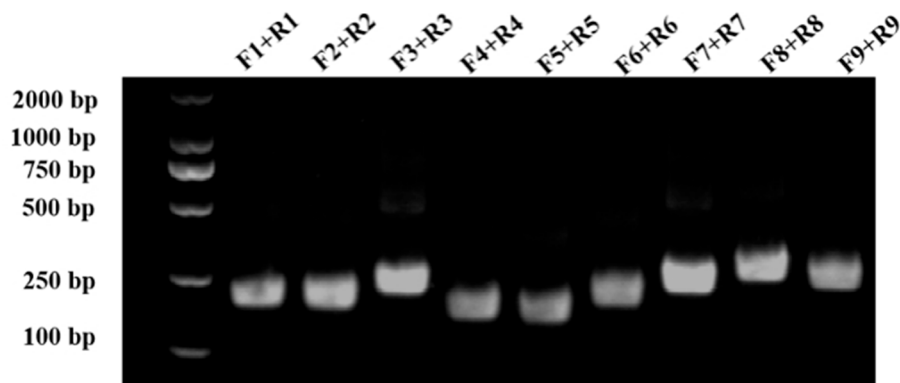

**Figure S2.** RAA primer screening. Amplification of the target *hilA* gene using RAA under the same conditions, followed by analysis of the amplification products using 2% agarose gel electrophoresis.

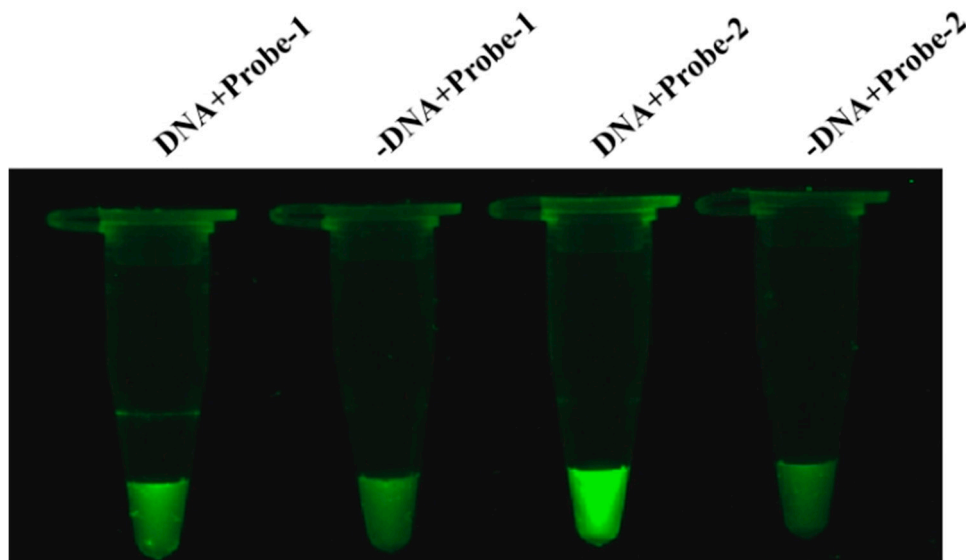

**Figure S3.** ssDNA fluorescent probe screening. Fluorescent probe screening: Probe 1 and Probe 2 were added to the reaction system, and it was observed that Probe 2 exhibited significantly stronger fluorescence than Probe 1 under UV light.

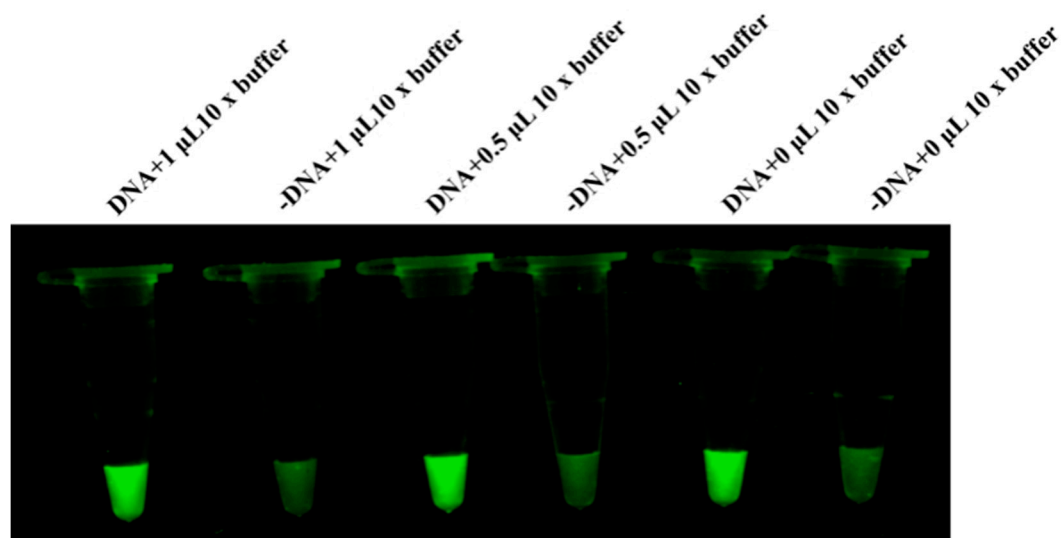

Figure S4. Optimization of reaction buffer. 0, 0.5  $\mu$ L, and 1  $\mu$ L of 10x dsDNase buffer were added to the reaction system, and no significant difference in fluorescence intensity was observed under UV light.

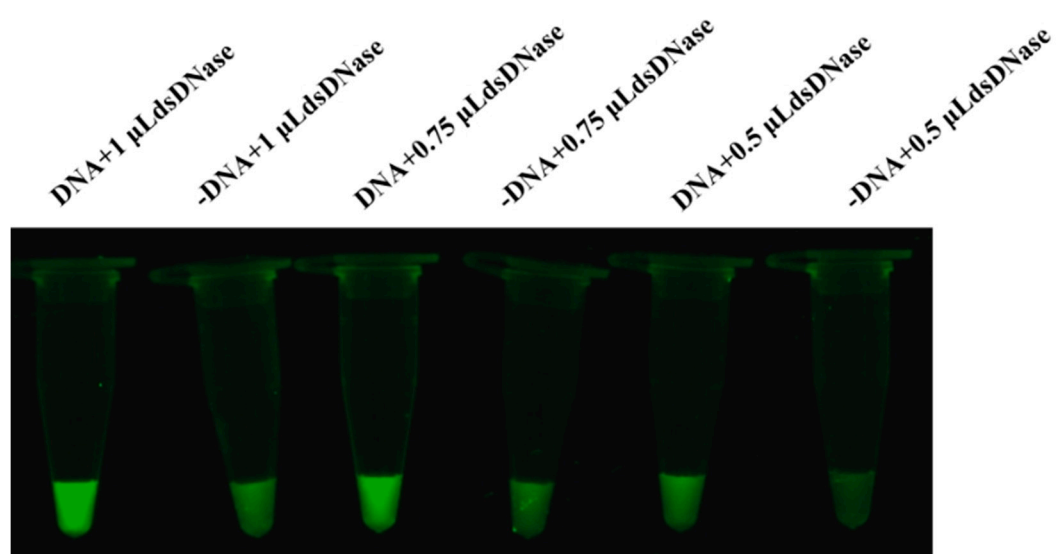

**Figure S5.** Optimization of dsDNase dosage. 0.5  $\mu$ L, 0.75  $\mu$ L, and 1  $\mu$ L of dsDNase were added to the reaction system, and the maximum fluorescence intensity was observed when 1  $\mu$ L of dsDNase was added.

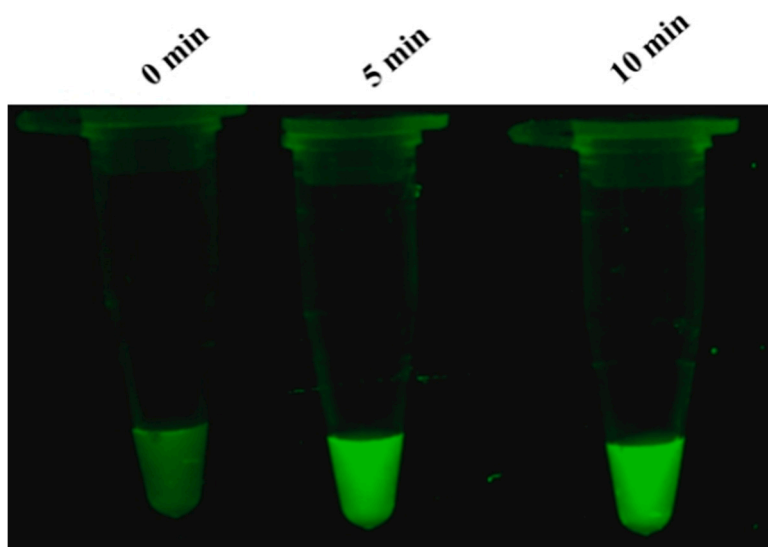

**Figure S6.** Optimization of reaction time. Fluorescence intensity is significantly higher at 5 minutes and 10 minutes after dsDNase treatment compared to 0 minutes, reaching the highest value at 10 minutes.

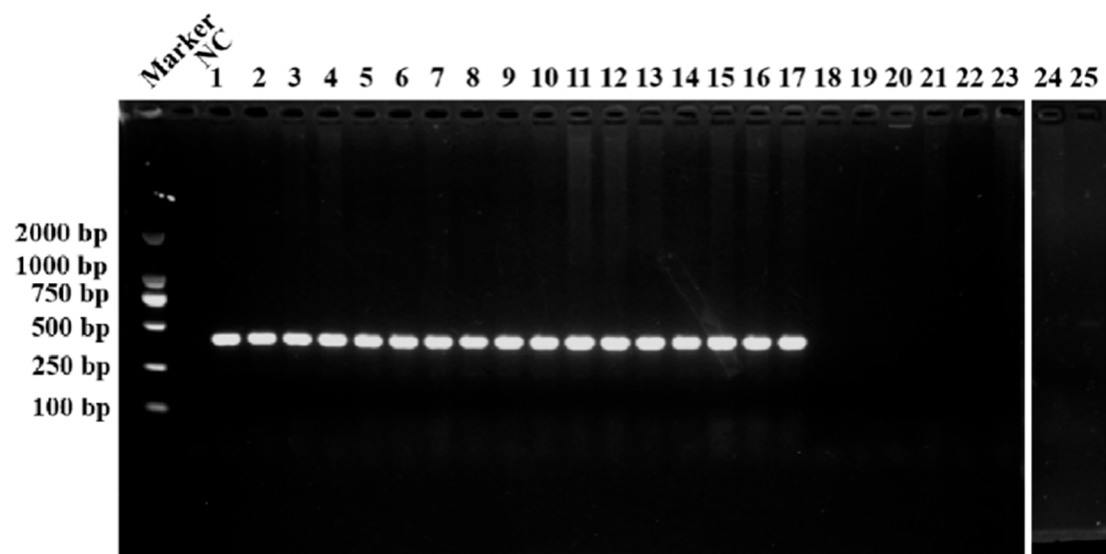

**Figure S7.** PCR detection of Salmonella and other strains. Strain numbers correspond to the details in Table S1.

Table S1. Bacteria strains used in this study.

| Number* | Strain types**                                         |
|---------|--------------------------------------------------------|
| 1       | Salmonella Enteritidis                                 |
| 2       | Salmonella Indiana                                     |
| 3       | Salmonella Typhimurium                                 |
| 4       | Salmonella Thompson                                    |
| 5       | Salmonella Infantis                                    |
| 6       | Salmonella potential monophasic variant of Typhimurium |
| 7       | Salmonella Derby                                       |
| 8       | Salmonella Anatum                                      |
| 9       | Salmonella Schwarzengrund                              |
| 10      | Salmonella London                                      |
| 11      | Salmonella Kentucky                                    |
| 12      | Salmonella Mbandaka                                    |
| 13      | Salmonella Goldcoast                                   |
| 14      | Salmonella Meleagridis                                 |
| 15      | Salmonella Rissen                                      |
| 16      | Salmonella Give                                        |
| 17      | Salmonella pullorum                                    |
| 18      | Klebsiella pneumoniae                                  |
| 19      | Escherichia coli                                       |
| 20      | Proteus mirabilis                                      |
| 21      | Pseudomonas aeruginosa                                 |
| 22      | Acinetobacter baumannii                                |
| 23      | Cronobacter sakazakii                                  |
| 24      | Staphylococcus aureus                                  |
| 25      | Enterococcus faecalis                                  |

\* Specificity test experiment corresponding number. \*\*All strains were maintained in the Animal Disease Prevention and Food Safety Key Laboratory of Sichuan Province, Sichuan University.



Table S2. Comparison of the RAA-dsDNase with other assays for Salmonella detecting.

| Methods                               | Pathogens      | Strategy | LOD (CFU/mL)      | Reference       |
|---------------------------------------|----------------|----------|-------------------|-----------------|
| Culture methods                       |                | Bacteria | 1 CFU/g           | ISO 6579-1:2017 |
| PCR                                   | Salmonella     | DNA      | $6.7 \times 10^3$ | [8]             |
| qPCR                                  | S. Enteritidis | DNA      | 40                | [13]            |
| Surface plasmon resonance             | S. Typhimurium |          | $10^4$            | [50]            |
| Immunoassays                          | S. Enteritidis | Bacteria | $5 \times 10^4$   | [51]            |
| LAMP                                  | Salmonella     | DNA      | 6.7               | [8]             |
| Electrochemical biosensor             | S. Typhimurium | bacteria | 2                 | [52]            |
| Gas-driven capillary                  | S. Typhimurium | DNA      | 37                | [53]            |
| CRISPR/Cas12a and silver nanoclusters | S. Typhimurium | DNA      | 1                 | [46]            |
| RPA-Cas13a                            | Salmonella     | DNA      | $10^2$ copies     | [14]            |
| RAA-dsDNase                           | Salmonella     | DNA      | 10                | This work       |

#### Reference

- [8] X. Mei, X. Zhai, C. Lei, X. Ye, Z. Kang, X. Wu, R. Xiang, Y. Wang, H. Wang, Development and application of a visual loop-mediated isothermal amplification combined with lateral flow dipstick (LAMP-LFD) method for rapid detection of Salmonella strains in food samples, Food Control, 104 (2019) 9-19.
- [13] J. Shen, X. Zhou, Y. Shan, H. Yue, R. Huang, J. Hu, D. Xing, Sensitive detection of a bacterial pathogen using allosteric probe-initiated catalysis and CRISPR-Cas13a amplification reaction, Nature communications, 11 (2020) 267.
- [50] S.H. Hyeon, W.K. Lim, H.J. Shin, Novel surface plasmon resonance biosensor that uses full-length Det7 phage tail protein for rapid and selective detection of Salmonella enterica serovar Typhimurium, Biotechnology and applied biochemistry, 68 (2021) 5-12.
- [51] K. Gu, Z. Song, C. Zhou, P. Ma, C. Li, Q. Lu, Z. Liao, Z. Huang, Y. Tang, H. Li, Y. Zhao, W. Yan, C. Lei, H. Wang, Development of nanobody-horseradish peroxidase-based sandwich ELISA to detect Salmonella Enteritidis in milk and in vivo colonization in chicken, Journal of nanobiotechnology, 20 (2022) 167.
- [52] Y. Ding, Y. Zhang, C. Huang, J. Wang, H. Li, X. Wang, An electrochemical biosensor based on phage-encoded protein RBP 41 for rapid and sensitive detection of Salmonella, Talanta, 270 (2024) 125561.
- [53] L. Gao, Y. Ge, J. Xie, Y. Li, H. Zhang, S. Du, A gas-driven capillary based on the synergy of the catalytic and photothermal effect of PB@Au for Salmonella typhimurium detection, Talanta, 269 (2024) 125455.
- [46] L. Ma, J. Wang, Y. Li, D. Liao, W. Zhang, X. Han, S. Man, A ratiometric fluorescent biosensing platform for ultrasensitive detection of Salmonella typhimurium via CRISPR/Cas12a and silver nanoclusters, Journal of hazardous materials, 443 (2023) 130234.
- [14] B. An, H. Zhang, X. Su, Y. Guo, T. Wu, Y. Ge, F. Zhu, L. Cui, Rapid and Sensitive Detection of Salmonella spp. Using CRISPR-Cas13a Combined With Recombinase Polymerase Amplification, Frontiers in microbiology, 12 (2021) 732426.
